# Supplementary material for: Design, synthesis and characterization of novel chromone based-copper(ii) antitumor agents with N,N-donor ligands: comparative DNA/RNA binding profile and cytotoxicity
Source: Royal Society of Chemistry journal article supplement (doi:10.1039/c8ra06722h), 2018-01-01
Supplement: c8ra06722h1.pdf [file c8ra06722h1.pdf]

## Design, synthesis and characterization of novel chromone based–copper (II) antitumor agents with *N,N*-donor ligands: comparative DNA/RNA binding profile and cytotoxicity.

Farukh Arjmand<sup>a\*</sup>, Zeenat Afsan<sup>a</sup> and Thierry Roisnel<sup>b</sup>

<sup>a</sup>Department of Chemistry, Aligarh Muslim University, Aligarh 202002, India.

<sup>b</sup>Institut des Sciences Chimiques de Rennes, Centre de Diffractométrie X (CDIFX) UMR6226 CNRS - Université de Rennes 1 Bât. 10B, p. 153 Campus de Beaulieu 35042 Rennes cedex, France

\*E-mail: farukh\_arjmand@yahoo.co.in. \*Corresponding author. Tel.: +91 5712703893

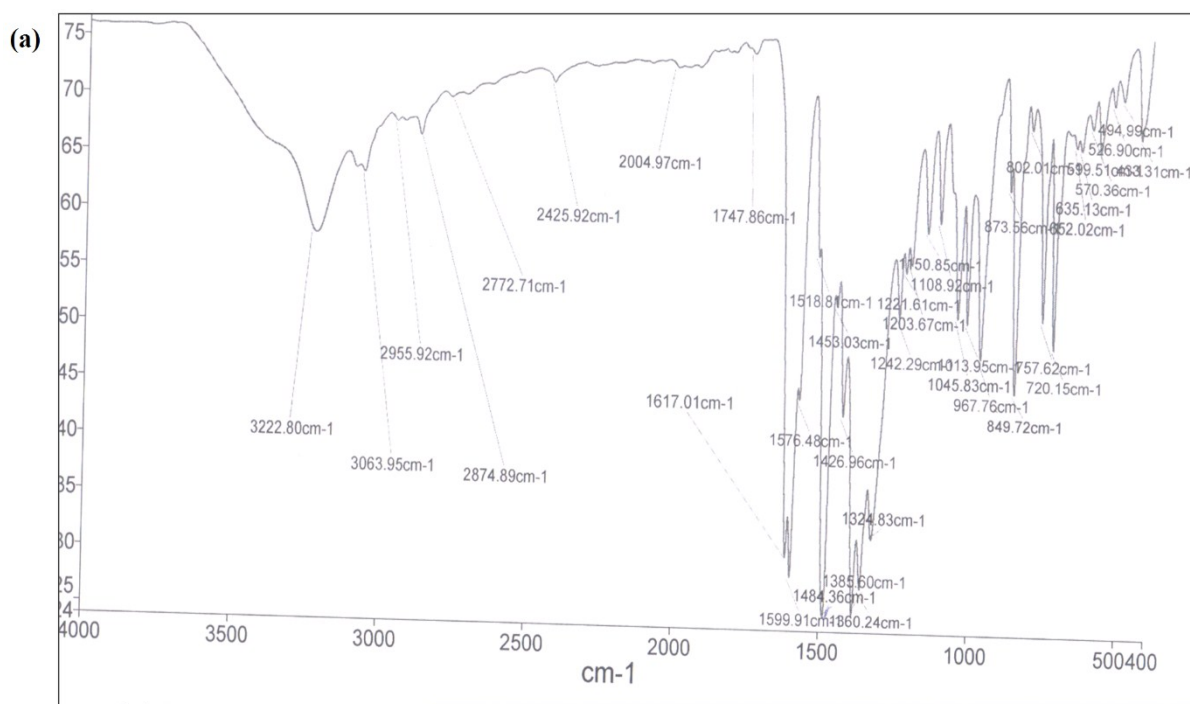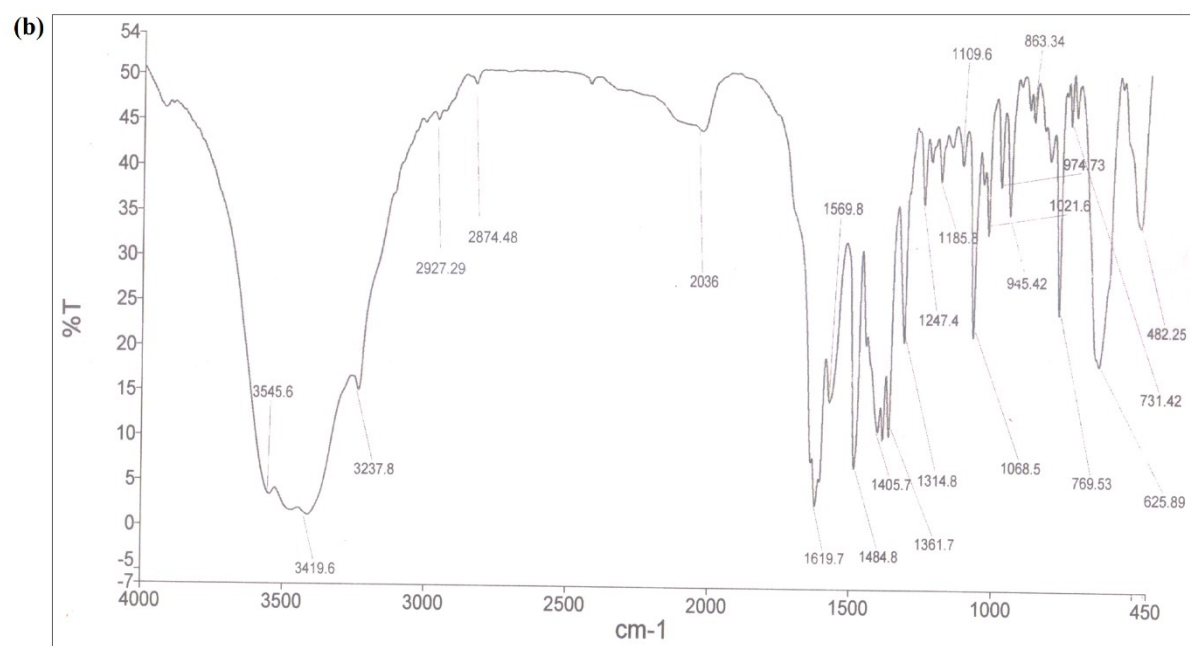

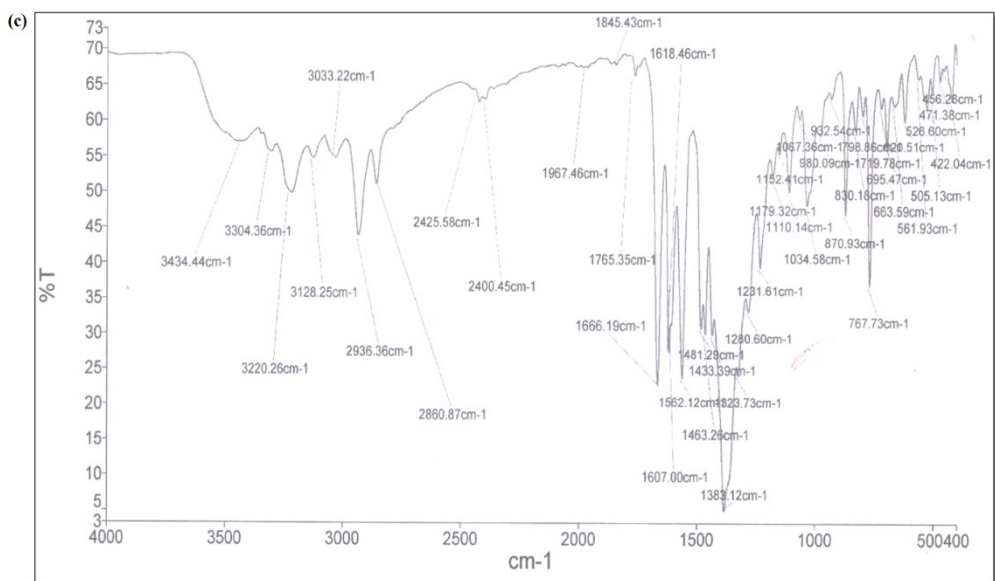

Fig S1. FT-IR spectra of complexes 1(a), 2 (b) and 3 (c).

(a)

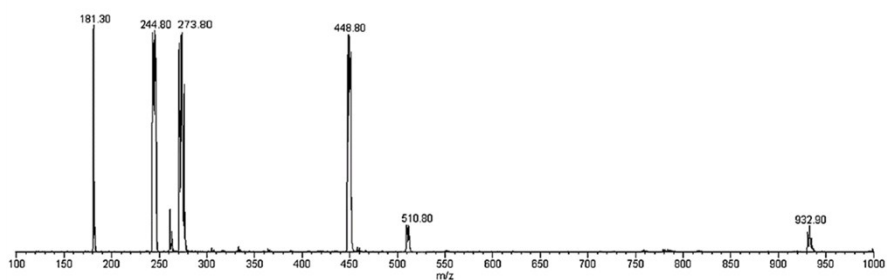

(b)

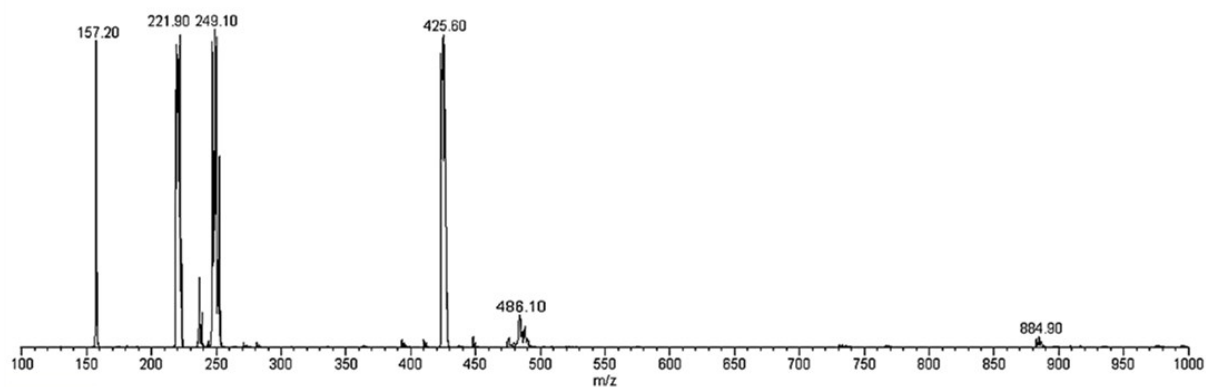

(c)

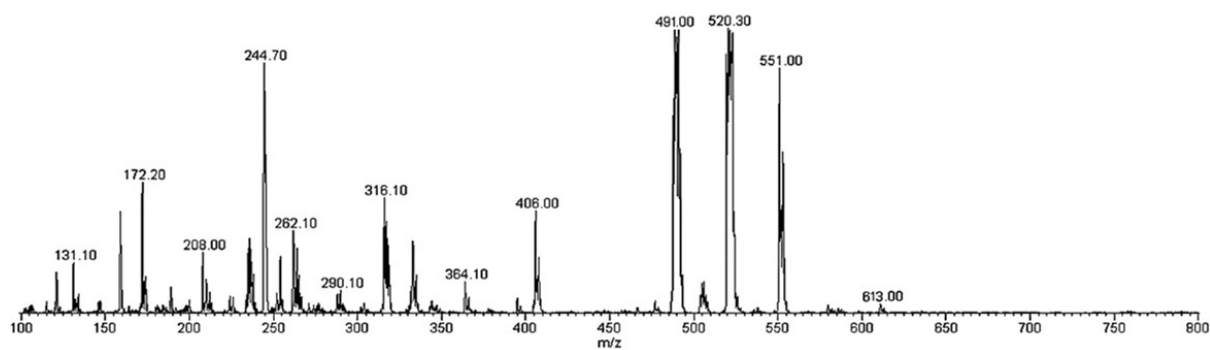

**Fig. S2.** ESI mass spectrum of complexes **1** (a), **2** (b) and **3** (c).

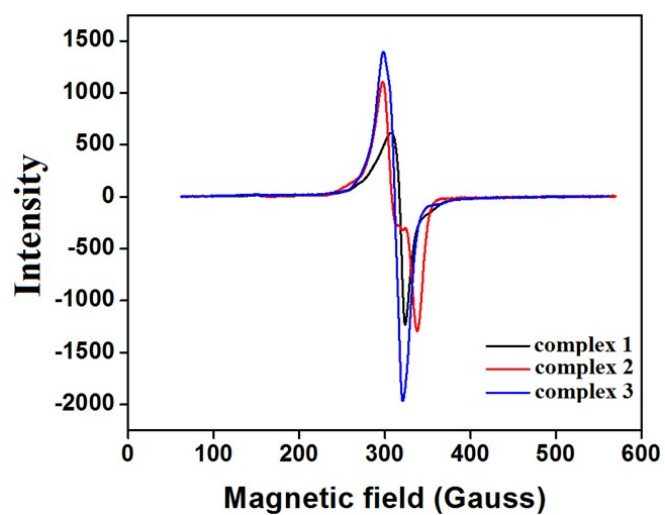

**Fig. S3.** X-band EPR spectrum of complexes **1** (a), **2** (b) and **3** (c) at room temperature.

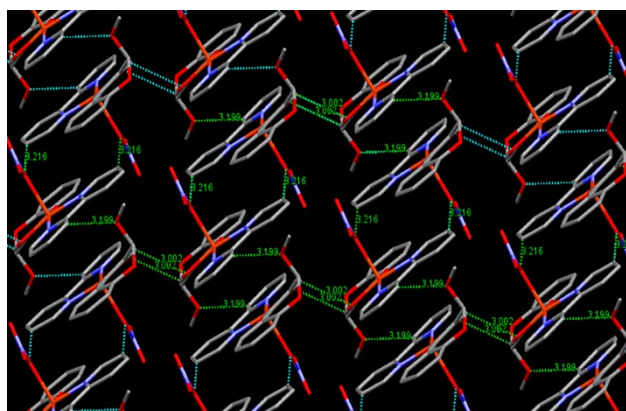

**Fig. S4.** Packing diagram showing possible intermolecular hydrogen bonding between C=O $\cdots$ H and N-O $\cdots$ H atoms.

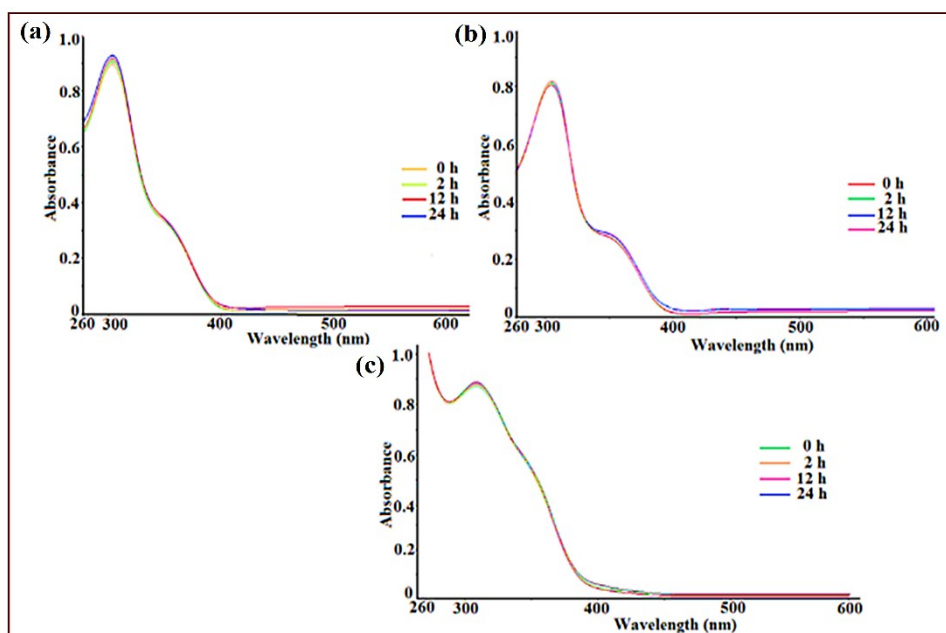

**Fig. S5.** UV-vis absorption spectra of complexes 1 (a), 2 (b) and 3 (c) in DMSO at different time intervals (0 h, 2 h, 12 h and 24 h).

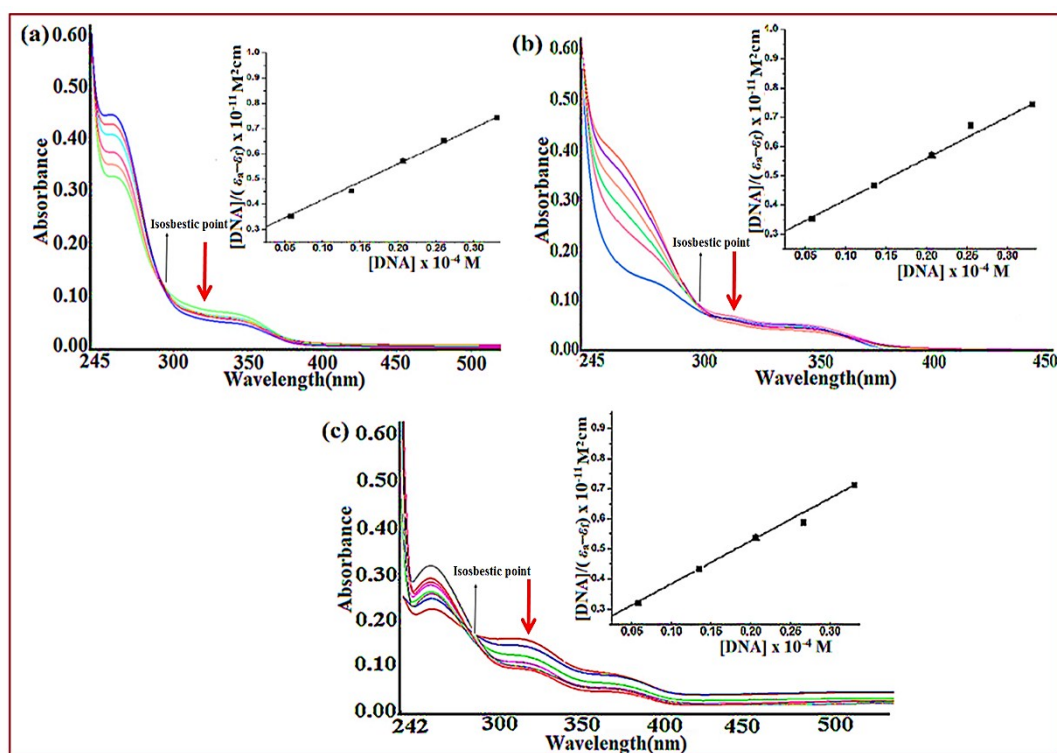

**Fig. S6.** Absorption titration curves of complexes 1 (a), 2 (b) and 3 (c) ( $2 \times 10^{-4} \text{ M}$ ) with ct-DNA ( $0.0\text{--}4.0 \times 10^{-5} \text{ M}$ ), in Tris-HCl buffer (pH 7.2). Arrows depicts the intensity change with increase in concentration of ct-DNA. Inset: Plots of  $[\text{DNA}]/(\epsilon_a - \epsilon_f) (\text{M}^2 \text{ cm})$  vs.  $[\text{DNA}]$ .

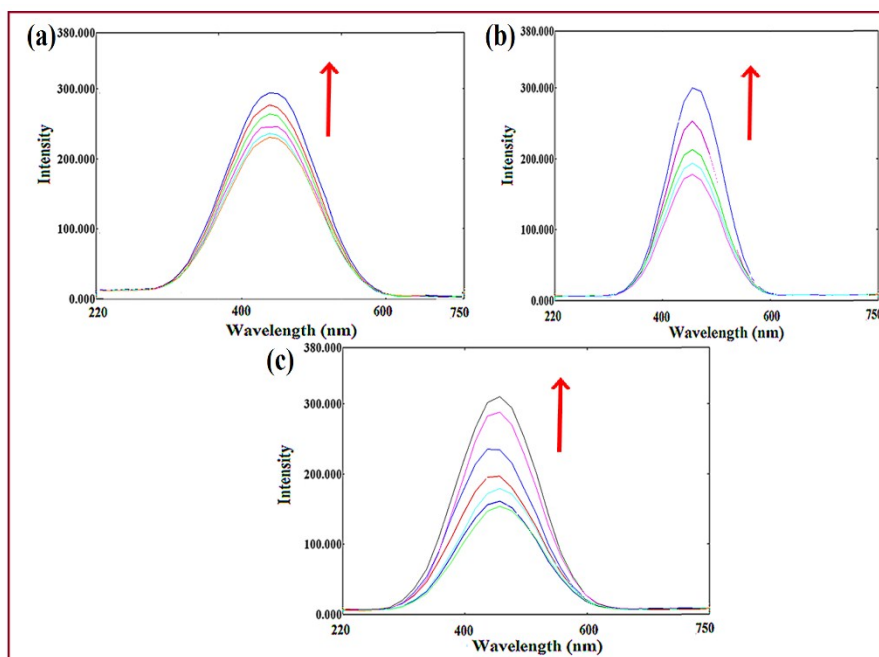

**Fig. S7.** Emission spectra of complexes **1** (a), **2** (b) and **3** (c) ( $2 \times 10^{-4}$  M) with ct-DNA [DNA] = ( $0-4.00 \times 10^{-5}$  M) in Tris-HCl buffer (pH 7.2). Arrows depicts the intensity change upon increasing concentration of ct-DNA.

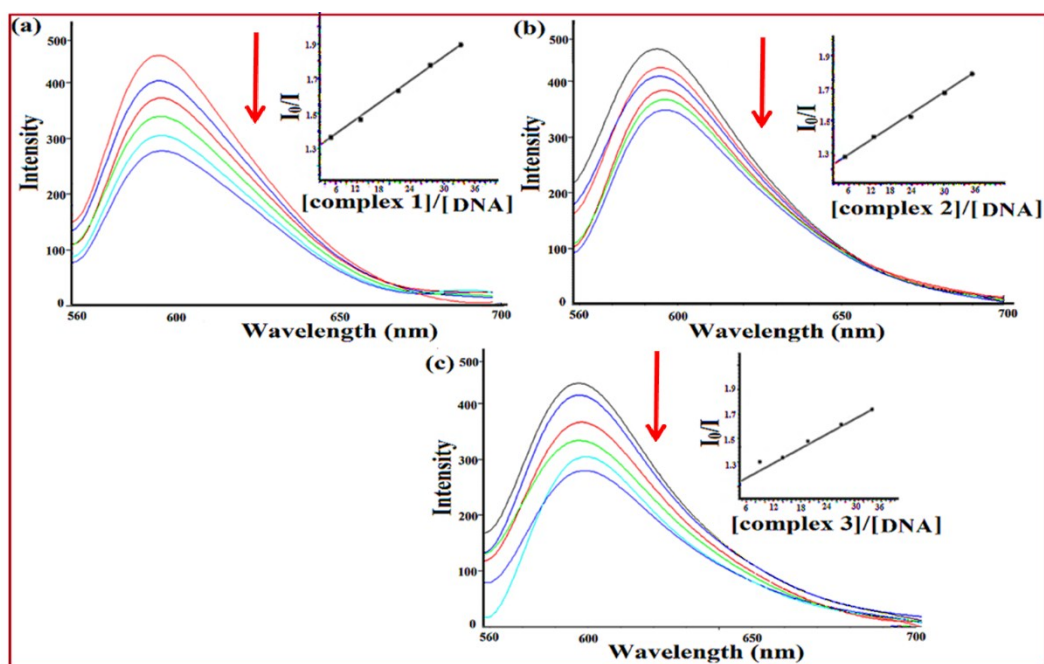

**Fig. S8.** Emission spectra of EB-ct-DNA in absence and presence of complexes **1** (a), **2** (b) and **3** (c) in Tris-HCl buffer (pH 7.2). [Complexes **1-3**] = [EB] = [DNA] =  $1.11 \times 10^{-4}$  M. Arrow depicts the intensity change with increasing concentration of complexes **1-3**.

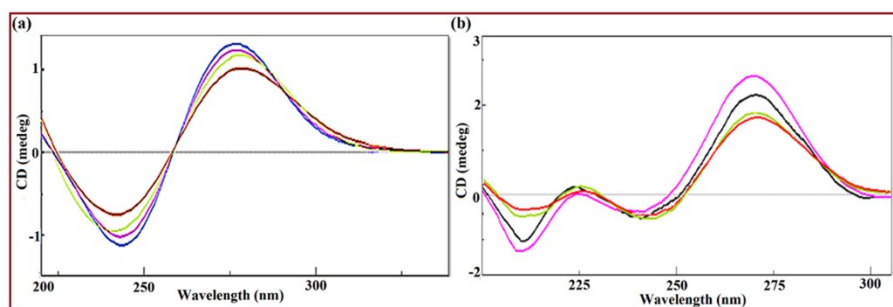

**Fig. S9.** CD spectra of (a) ct-DNA alone (blue), ct-DNA + **1** (brown), ct-DNA + **2** (pink) and ct-DNA + **3** (green); (b) tRNA alone (pink), tRNA + **1** (red), tRNA + **2** (black), tRNA + **3** (green) in Tris-HCl buffer (pH = 7.2).

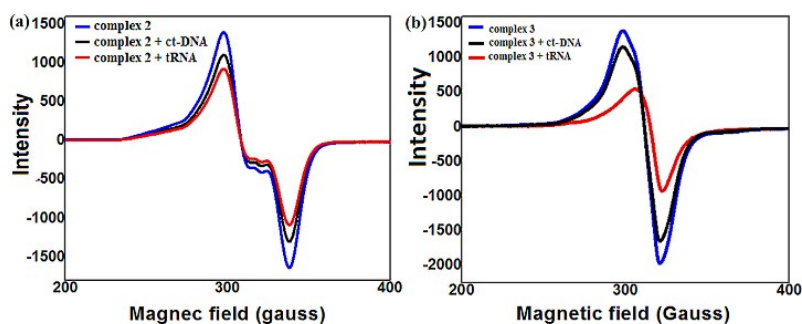

**Fig. S10.** X-band EPR spectra of (a) 0.3 mM complex 2 (red), 0.3 mM complex 2 + 1.4 mg mL<sup>-1</sup> tRNA (black) and 0.3 mM complex 2 + 1.4 mg mL<sup>-1</sup> ct-DNA (blue); (b) 0.3 mM complex 3 (red), 0.3 mM complex 3 + 1.4 mg mL<sup>-1</sup> tRNA (blue) and 0.3 mM complex 3 + 1.4 mg mL<sup>-1</sup> ct-DNA (black). Experimental conditions: T = 298 K; Microwave frequency = 9.46 GHz; microwave power = 20 mW; 10 G field modulation amplitude; time constant 81.92 ms; conversion time 81.92 ms; 3 accumulations.

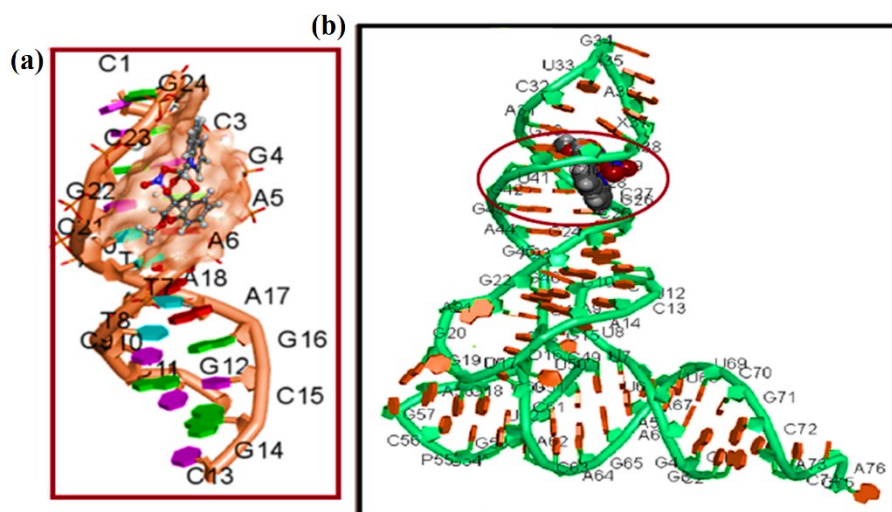



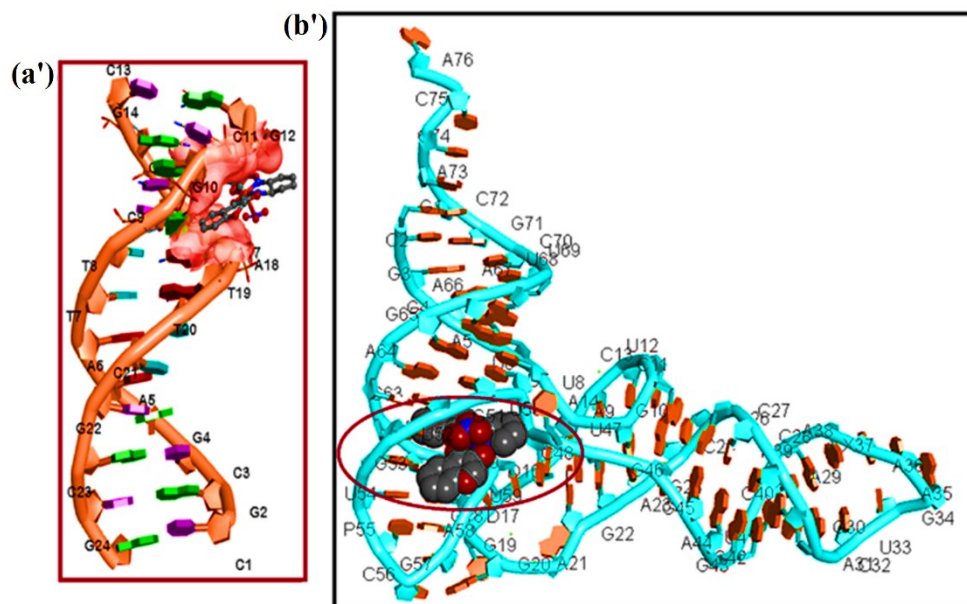

**Fig. S11.** Molecular docked model of complex 1 with (a) ct-DNA (PDB ID: 1BNA), (b) tRNA (PDB ID: 6TNA); complex 3 with (a') ct-DNA (PDB ID: 1BNA) and (b') tRNA (PDB ID: 6TNA).
